# Supplementary material for: Systems Pharmacology‐Based Discovery of Natural Products for Precision Oncology Through Targeting Cancer Mutated Genes
Source: PubMed Central journal article supplement — CPT Pharmacometrics Syst Pharmacol. 2017 Mar 14;6(3):177–87. doi: 10.1002/psp4.12172 (PMC5356618; doi:10.1002/psp4.12172), 2017-03-14
Supplement: PSP4-6-177-s001.pdf [file PSP4-6-177-s001.pdf]

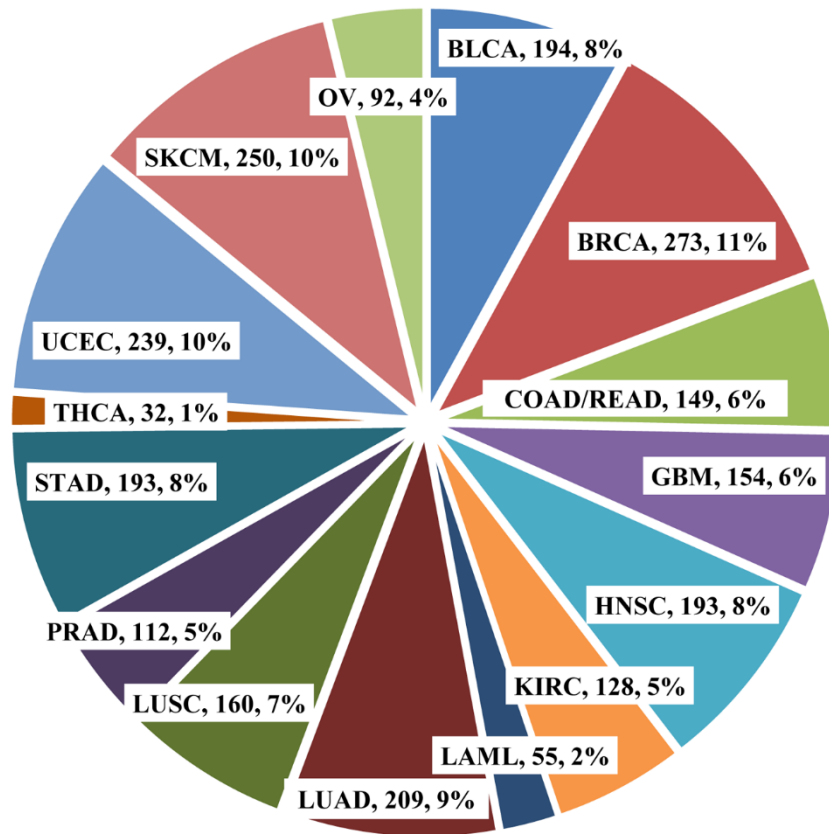

**Figure S1. The distribution of cancer significantly mutated genes for 15 cancer types.** The abbreviates of 15 major cancer types/subtypes are consisted: acute myeloid leukemia (LAML), bladder urothelial carcinoma (BLCA), breast invasive carcinoma (BRCA), colon and rectal adenocarcinoma (COAD/READ), glioblastoma multiforme (GBM), head and neck squamous cell carcinoma (HNSC), kidney renal clear cell carcinoma (KIRC), lung adenocarci-noma (LUAD), lung squamous cell carcinoma (LUSC), ovarian serous cystadenocarcinoma (OV), prostate adenocarcinoma (PRAD), skin cutaneous melanoma (SKCM), stomach adeno-carcinoma (STAD), thyroid carcinoma (THCA), and uterine corpus endometrial carcinoma (UCEC).
